# Supplementary material
Source: Springer Nature journal article supplement (https://www.springermedizin.de/resource/supplementary/12936_2012_2732_MOESM1_ESM.pdf/9544510)

**A**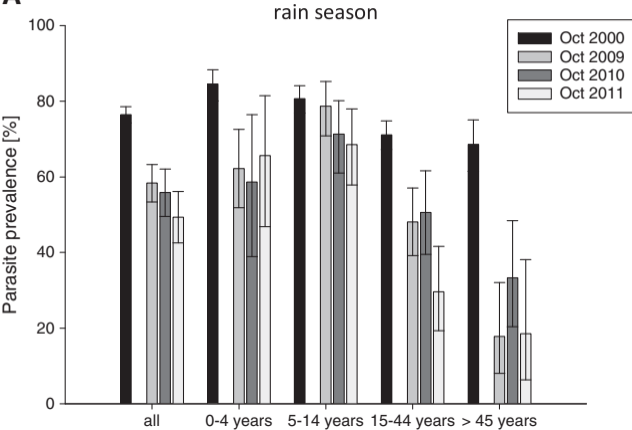**B**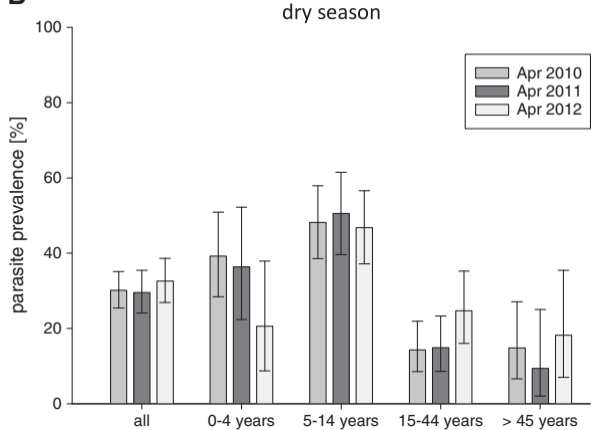

Supplement: MOESM1 [file 9544510]
